# Supplementary material for: The design of triple shape memory polymers with stable yet tunable temporary shapes by introducing photo-responsive units into a crystalline domain
Source: Royal Society of Chemistry journal article supplement (doi:10.1039/c8py01810c), 2019-01-01
Supplement: c8py01810c4.pdf [file c8py01810c4.pdf]

## Supporting Information

### Design of Triple Shape Memory Polymers with Stable yet Tunable Temporary Shapes by Introducing Photo-Responsive Units into a Crystalline Domain

Yongwei Wu, Zhitao Hu, Huahua Huang,\* Yongming Chen\*

Center for Functional Biomaterials, School of Materials Science and Engineering, Key Laboratory for Polymeric Composite and Functional Materials of Ministry of Education, Sun Yat-sen University, No. 135, Xingang Xi Road, Guangzhou 510275, China

\* Corresponding author: HHH (email: huanghh27@mail.sysu.edu.cn); YMC (email: chenym35@mail.sysu.edu.cn)

**Table S1.** Polymerization conditions<sup>a</sup> and characterization results of PBCL.

| Sample | [BrCL]:[CL]<br>:[DPP]:[Ini.] | Time<br>(h) | BC <sup>b</sup><br>(%) | CC <sup>c</sup><br>(%) | MR <sup>d</sup><br>(mol%) | $M_{n,NMR}^e$<br>(kDa) | $M_{n,GPC}^f$<br>(kDa) | $M_w/M_n^f$ |
|--------|------------------------------|-------------|------------------------|------------------------|---------------------------|------------------------|------------------------|-------------|
| PBCL1  | 3:90:2:1                     | 18          | 97.1                   | 98.3                   | 3.0                       | 10.7                   | 12.8                   | 1.30        |
| PBCL2  | 10:100:2:1                   | 16          | 66.9                   | 97.7                   | 6.0                       | 12.5                   | 14.8                   | 1.23        |

<sup>a</sup> Polymerizations were carried out by using DPP as a catalyst and ethylene glycol as an initiator with monomer concentration of 1 M in toluene at room temperature. <sup>b</sup> BrCL

conversion calculated by  $^1\text{H}$  NMR of polymers before purification. <sup>c</sup> CL conversion calculated by  $^1\text{H}$  NMR of polymers before purification. <sup>d</sup> the molar ratio of BrCL units in the resulting copolymer calculated by  $^1\text{H}$  NMR of purified product. <sup>e</sup>  $M_{n, \text{NMR}} = (\text{BrCL conversion} \times \text{ratio of BrCL to initiator} \times M_{\text{BrCL}} + \text{CL conversion} \times \text{ratio of CL to initiator} \times M_{\text{CL}} + M_{\text{ini}})/\text{initiation efficiency}$ , where initiation efficiency was estimated to be 100%. <sup>f</sup> Determined by GPC in DMF with polystyrene standards as calibration.

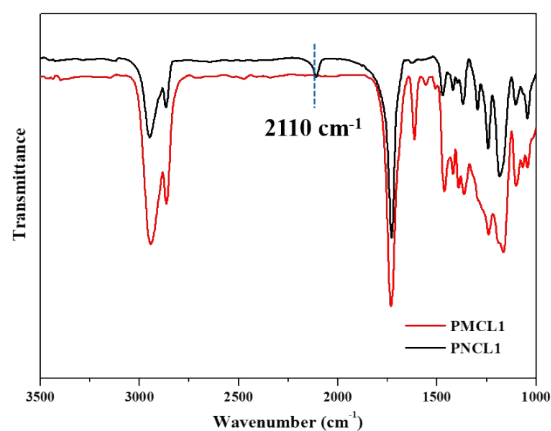

**Figure S1.** FT-IR spectra of PNCL1 and PMCL1.

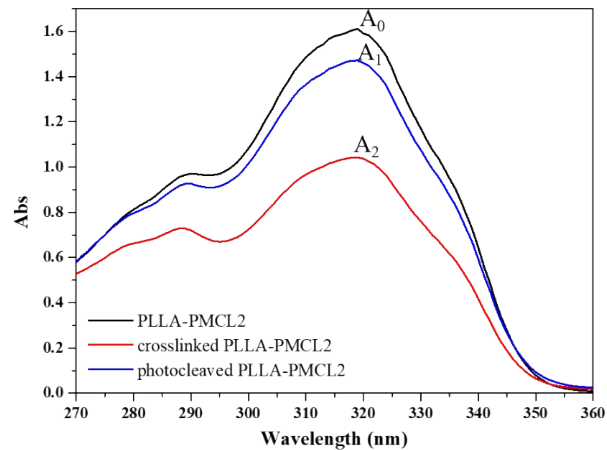

**Figure S2.** UV-Vis curves of reversible photo reactions of PLLA-PMCL2 in DMF solution when irradiation at 365 nm for 5 min and then at 254 nm for 90 min. (reversibility ratio =  $(A_1 - A_2)/(A_0 - A_2)$ )

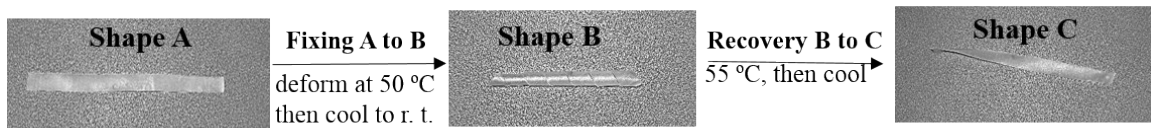

**Figure S3.** Series of photographs showing a one-way shape memory programming procedure and shape recovery to demonstrate thermally-induced SME of PLLA-PMCL1.
